# Supplementary material for: Distribution of age at natural menopause, age at menarche, menstrual cycle length, height and BMI in BRCA1 and BRCA2 pathogenic variant carriers and non-carriers: results from EMBRACE
Source: Breast Cancer Res. 2025 May 21;27:87. doi: 10.1186/s13058-025-02030-9 (PMC12093752; doi:10.1186/s13058-025-02030-9)
Supplement: Supplementary file 1 — Supplementary Material 1. [file 13058_2025_2030_MOESM1_ESM.xlsx]

## Sheet: STable 1
STable 1: Distribution of protein truncating, missense, and in frame deletions observed in EMBRACE PV carriers
	BRCA1 PV carriers	BRCA2 PV carriers
IFD	6	3
MS	20	6
No RNA	11	2
PTV	293	372
Unknown	75	43
IFD, in frame deletion as a result of a small deletion, aberrant splicing or large genomic rearrangement;
MS, pathogenic missense variant
PTV, pathogenic variant generating a premature termination codon as a result of a nonsense substitution, or a frameshift due to small deletion or insertion, aberrant splicing or large genomic rearrangement

## Sheet: STable 2
STable 2: Numbers of women excluded from the data for construction of the analytical dataset, and numbers with missing information in key variables measured
	BRCA1 PV carriers	BRCA2 PV carriers	Non-carriers	BRCA1 PV carriers vs non-carrier Pr(>|z|)a	BRCA2 PV carriers vs non-carrier Pr(>|z|)a
Data exclusions and construction of the analytic dataset
Starting dataset	3051	3272	2868
Individual with no information on any risk factors	1	0	0
Individuals with age at menarche >25 (ie. 50 and 29)	0	1	1
Individuals with age at cancer diagnosis less than 15 years of age	0	4	1
Reason periods stopping given as RRSO/hysterectomy but neither age at RRSO or age at which periods stopped available	2	0	3
Reason for period stopping given as natural menopause but no information on age at which periods stopped available	2	3	6
Missing Data
Analytical Data-set	3046	3264	2857
Age at menarche (years)
Unknown AAM (N)	35	24	25
% Missing	0.0114905	0.00735294	0.00875044	0.245375	0.661833
Height (m)
Unknown height (N)	6	7	6
% Missing	0.0019698	0.00214461	0.00210011	0.929083	0.917956
BMI at interview (kg)
Unknown BMI (N)	26	22	30
% Missing	0.00853578	0.0067402	0.0105005	0.423485	0.122149
BMI at age 18 (kg)
Unknown BMI age 18 (N)	109	101	101
% Missing	0.0357846	0.0309436	0.0353518	0.912489	0.451477
Age at first birth (years)
Missing	1	2	1
% Missing	0.000328299	0.000612745	0.000350018	-	-
Q. Have you had a menstrual period within the last 12 months?
Unknown (N)	15	16	11
% Missing	0.00492449	0.00490196	0.00385019	0.503692	0.503692
Q. Have your periods stopped completely?
Unknown (N)	13	15	14
% Missing	0.00426789	0.00459559	0.00490025	0.503692	0.954852
Missing age periods stopped but reason for periods stopping is not missing (and is not 'natural menopause')
Unknown (N)	12	13	12
% Missing	0.00393959	0.00398284	0.00420021	-	-
Reason given for periods stopping is RRSO/Hysterectomy but missing age at RRSO and no evidence for hysterectomy (censored at age periods stopped)
Unknown (N)	30	13	10	-	-
aLogistic regression comparing missing vs non-missing data and BRCA1 or BRCA2 PV vs non-carrier status.

## Sheet: STable 3
STable 3. First event experienced by BRCA1, BRCA2 PV carriers and non-carriers in women designated as pre-menopausal or having experienced natural menopause
	Gene/carrier status
	BRCA1 carriers	BRCA2 carriers	Non-carriers
	N = 3,046	N = 3,264	N = 2,857
Premenopausal
RRSO	307	226	154
Age periods stopped	242	325	280
Breast cancer	1002	916	53
Ovarian cancer	81	35	4
Deathb	1	0	0
Other cancer	82	93	65
Peritoneal cancer	4	2	0
FallTube cancer	1	1	0
Interview	947	1020	1656
Total	2667	2618	2212
Menopausal (Natural menopause)
RRSOa	0	0	0
Age periods stopped	327	552	553
Breast cancer	1	0	0
Ovarian cancer	0	0	0
Death	0	0	0
Other cancer	0	1	0
Peritoneal cancer	0	0	0
FallTube cancer	0	0	0
Interview	0	0	0
Age 55	51	93	92
Total	379	646	645
For women assigned to the pre-menopausal group and censored at 'Age periods stopped', the main reason given was 'RRSO/Hysterectomy' and Hysterectomy was a primary reason; other reasons (for a small number of women) were chemotherapy, radiotherapy, medication, contraception, and
45 BRCA1 carriers, 68 BRCA2 carriers , and 55 non-carriers, classifed as premenopausal and censored at Age periods stopped gave 'other' as reason for menopause
11 BRCA1 carriers, 5 BRCA2 carriers and 17 non-carrier women classified as premenopausal censored at age at interview said they had experienced natural menopause on questionnaire, and the age periods stopped for these women was close to age at interview (26 of these women had indicated in another question that they had had periods in the last 12 months)
There was some uncertainty in the allocating these women, but sensitivity analyses including them as menopausal made little difference to the results
aage at RRSO was the same as 'Age periods stopped' for 9 women (three BRCA1, three BRCA2 and three non-carriers) but reason given is natural menopause or reaching age 55, therefore included as having experienced natural menopause
b one person has age at death recorded 3 month prior to age at interview; cause of death is unknown/ill-defined, no cancer recorded

## Sheet: STable 4
STable 4: Computed weights in EMBRACE, assuming UK BRCA1 and BRCA2 PV carrier incidence rates a
Age category	External average incidences	BC (N)	Affected PYRS	Weights for affected women	Unaffected (N)	Unaffected PYRS	Weights for unaffected women
BRCA1 PV carriers
18-24	0.001	10	51.15	1.683	142	640.98	0.952
25-29	0.005	102	319.05	0.643	194	517.87	1.188
30-34	0.011	243	628	0.534	245	584.67	1.462
35-39	0.016	285	681.82	0.517	252	615.43	1.546
40-44	0.022	263	619.81	0.557	217	502.08	1.537
45-49	0.03	200	453.02	0.67	180	448.6	1.366
50-54	0.033	119	266.58	0.786	142	326.29	1.18
55-59	0.033	70	162.55	0.801	127	284.07	1.11
60-64	0.032	26	64.9	1.222	93	235.27	0.938
65-69	0.03	23	56.43	0.569	63	134.48	1.157
70-79	0.024	5	24.03	0.783	45	140.04	1.024
Total all ages		1346			1700
BRCA2 PV carriers
18-24	0	7	28.19	1.506	116	515.51	0.969
25-29	0.002	46	133.15	0.797	154	423.69	1.061
30-34	0.006	148	404.38	0.512	237	575.48	1.305
35-39	0.009	233	622.61	0.46	278	635.47	1.452
40-44	0.014	287	697.61	0.437	246	600.07	1.657
45-49	0.018	272	650.18	0.426	194	458.6	1.805
50-54	0.022	171	390.49	0.549	163	381.88	1.473
55-59	0.026	115	264.17	0.64	160	398.35	1.259
60-64	0.025	76	161.73	0.564	113	270.69	1.294
65-69	0.017	28	55	0.499	113	241.88	1.124
70-79	0.012	18	52.86	0.335	89	409.78	1.135
Total all ages		1401			1863
PYRS, person years; BC, breast cancers in EMBRACE; N, number; BC (N) number of breast cancers diagnosed at interview.
a 158 BRCA1 PV carriers, 125 BRCA2 PV carriers and 27 non-carriers underwent prophylactic bilateral mastectomy and had no breast cancer diagnosis prior to interview
Note: 105 non-carriers were diagnosed with BC at interview

## Sheet: STable 5
STable 5: Breast cancer incidences for BRCA1 and BRCA2 PV carriers by age category and birth cohort
Age category	Birth cohort	BRCA1 PV carriers	BRCA2 PV carriers
18-24	<1920	0.000472157	0.000275357
25-29	<1920	0.0029371	0.0014513
30-34	<1920	0.00765642	0.00375342
35-39	<1920	0.0116312	0.00670848
40-44	<1920	0.0152706	0.00958994
45-49	<1920	0.0177396	0.0109063
50-54	<1920	0.01765	0.0115658
55-59	<1920	0.0175241	0.0138812
60-64	<1920	0.017347	0.0135078
65-69	<1920	0.0169264	0.00941888
70-79	<1920	0.0169784	0.00889489
18-24	1920-1929	0.000472186	0.000275371
25-29	1920-1929	0.00294638	0.0014558
30-34	1920-1929	0.00770772	0.00377888
35-39	1920-1929	0.0119394	0.00688922
40-44	1920-1929	0.0165197	0.0103733
45-49	1920-1929	0.0199077	0.0122389
50-54	1920-1929	0.0194777	0.0127557
55-59	1920-1929	0.0195485	0.0155025
60-64	1920-1929	0.0208895	0.0162415
65-69	1920-1929	0.0208338	0.0115971
70-79	1920-1929	0.0203777	0.0106629
18-24	1930-1939	0.000480957	0.000280457
25-29	1930-1939	0.00298402	0.00147444
30-34	1930-1939	0.00807548	0.00396166
35-39	1930-1939	0.0128429	0.00741068
40-44	1930-1939	0.0171821	0.0107903
45-49	1930-1939	0.0207737	0.0127695
50-54	1930-1939	0.0236587	0.0155415
55-59	1930-1939	0.0268358	0.0212846
60-64	1930-1939	0.0272095	0.0211991
65-69	1930-1939	0.0252315	0.0140719
70-79	1930-1939	0.0232151	0.0121372
18-24	1940-1949	0.000512371	0.000297957
25-29	1940-1949	0.0034569	0.00170796
30-34	1940-1949	0.00871008	0.00426704
35-39	1940-1949	0.0129421	0.00746598
40-44	1940-1949	0.0184065	0.0115566
45-49	1940-1949	0.0263479	0.0161912
50-54	1940-1949	0.0318439	0.0209039
55-59	1940-1949	0.0331299	0.0262411
60-64	1940-1949	0.0332275	0.0258551
65-69	1940-1949	0.0311944	0.0174103
70-79	1940-1949	0.0254403	0.0132417
18-24	1950-1959	0.000587229	0.000341914
25-29	1950-1959	0.00366032	0.00180904
30-34	1950-1959	0.00959382	0.00470462
35-39	1950-1959	0.0149131	0.00860408
40-44	1950-1959	0.0208086	0.0130658
45-49	1950-1959	0.0285283	0.0175324
50-54	1950-1959	0.0327148	0.0214564
55-59	1950-1959	0.0326006	0.0258129
60-64	1950-1959	0.0329428	0.0256122
65-69	1950-1959	0.0316223	0.0176441
70-79	1950-1959	0.0256445	0.0133418
18-24	1960-1969	0.0006445	0.0003743
25-29	1960-1969	0.004339	0.0021444
30-34	1960-1969	0.0109097	0.0053455
35-39	1960-1969	0.0162422	0.00936858
40-44	1960-1969	0.0230345	0.0144624
45-49	1960-1969	0.0315869	0.0194133
50-54	1960-1969	0.0345491	0.0226409
55-59	1960-1969	0.0331785	0.0262628
60-64	1960-1969	0.0330782	0.0257231
65-69	1960-1969	0.0316379	0.017653
70-79	1960-1969	0.025646	0.0133424
18-24	1970-1979	0.000744871	0.000433529
25-29	1970-1979	0.00445982	0.00220602
30-34	1970-1979	0.010958	0.00536966
35-39	1970-1979	0.0166275	0.00959332
40-44	1970-1979	0.0239682	0.0150485
45-49	1970-1979	0.0324896	0.0199688
50-54	1970-1979	0.0348115	0.0228069
55-59	1970-1979	0.0331677	0.0262538
60-64	1970-1979	0.0330714	0.0257174
65-69	1970-1979	0.0316379	0.017653
70-79	1970-1979	0.025646	0.0133424
18-24	1980+	0.000810786	0.000471271
25-29	1980+	0.00507442	0.00250978
30-34	1980+	0.0120165	0.00588336
35-39	1980+	0.0171948	0.00991464
40-44	1980+	0.0241267	0.0151483
45-49	1980+	0.0325409	0.0200004
50-54	1980+	0.0348209	0.0228127
55-59	1980+	0.0331677	0.0262538
60-64	1980+	0.0330714	0.0257174
65-69	1980+	0.0316379	0.017653
70-79	1980+	0.025646	0.0133424
Individuals were weighted such that the observed breast cancer incidence rates were consistent with established age-specific incidence rates and relative risk estimates for BRCA1 and BRCA2 PV carriers (31,32) and https://www.medrxiv.org/content/10.1101/2024.04.18.24305970v2

## Sheet: STable 6
STable 6: Association between age at natural menopause and BRCA1 and BRCA2 PV carrier vs non-carrier status, limiting definition of PV carriers to PTVs
	BRCA1 PV carriers				BRCA2 PV carriers
	estimate	L95CI	U95CI	p-value	estimate	L95CI	U95CI	p-value
Linear regression among pre and post-menopausal women using cens.normal function in VGAM
+ Birth cohort	-0.059	-0.489	0.371	0.787	-0.155	-0.528	0.218	0.415
+ Parity+AFB+BMI+AAMa	-0.105	-0.533	0.322	0.63	-0.129	-0.503	0.246	0.501
+ Parity+AFB+BMI18+AAMa	-0.032	-0.461	0.397	0.884	-0.115	-0.492	0.261	0.548
In women with ANM or end of FUP >=40 years	0.036	-0.375	0.448	0.863	0.05	-0.298	0.399	0.777
In total, 2261 BRCA1 PV carriers, 2878 BRCA2 PV carriers, and 2857 non-carriers were included in these analyses
PTV, pathogenic variant generating a premature termination codon as a result of a nonsense substitution, or a frameshift due to small deletion or insertion, aberrant splicing or large genomic rearrangement
ANM, age at natural menopause; AAM, age at menarche; AFB, age at first birth; BMI, Body Mass Index at baseline; BMI18, BMI at age 18 years; FUP, follow-up
Analyses were adjusted for birth cohort (categorised as <1940, 1940-1949,1950-1959, >=1960) and using weights derived as described in the Methods.
a carried out on data with no missing information on AAM, BMI or BMI at age 18, parity; Parity and AFB treated as categorical variables

## Sheet: STable 7
STable 7: Association between age at menarche, height, and BMI at age at interview or BMI at age 18 years and BRCA1 and BRCA2 PV carrier vs non-carrier status - unweighted analyses
	BRCA1 PV carriers				BRCA2 PV carriers
	estimate	L95CI	U95CI	p.value	estimate	L95CI	U95CI	p.value
Trait
AAM (years)
+Birth cohort (finer)	0.0341073	-0.0461677	0.114382	0.404922	-0.0431533	-0.120009	0.0337025	0.271067
+Birth cohort (finer)+BMI18	0.032467	-0.0474787	0.112413	0.425985	-0.0468935	-0.123322	0.0295345	0.229097
+Birth cohort (finer)+BMI18+height	0.0264398	-0.053553	0.106433	0.517036	-0.052412	-0.128817	0.0239933	0.178755
height (m)
+Birth cohort (finer)	0.0044618	0.000952759	0.00797083	0.0127073	0.00370274	0.000254134	0.00715134	0.0353483
+Birth cohort (finer) +AAM+Parity+AFB a	0.00388886	0.000396992	0.00738073	0.0290575	0.0033203	-0.000109061	0.00674966	0.057742
+Birth cohort (finer) +BMI18+AAM+Parity+AFB a	0.00340941	-0.000107524	0.00692635	0.0574251	0.0028956	-0.000549248	0.00634045	0.0994459
BMI (kg)
+Birth cohort (finer)	-0.104966	-0.382376	0.172445	0.458263	0.0443848	-0.234641	0.32341	0.755176
+Birth cohort (finer)+AAM+height+Parity+AFB a	-0.00806457	-0.278807	0.262678	0.953437	0.118471	-0.153637	0.390579	0.393413
BMI at age 18 (kg)
+Birth cohort (finer)	-0.0577818	-0.233613	0.11805	0.519458	-0.0406927	-0.208985	0.127599	0.635507
+Birth cohort (finer)+AAM+height	-0.0219273	-0.193643	0.149788	0.80234	-0.0395654	-0.204059	0.124928	0.637283
AAM, Age at menarche; all analyses adjusted for birth cohort (<1940, 1940-1949,1950-1959, 1960-1969, 1970-1979, >=1980); BMI, Body Mass Index at baseline, BMI18, BMI at age 18 years; AFB, Age at first birth
a Only women with no missing information on age at menarche, BMI, height and parity were included in the analyses; Parity and AFB treated as categorical variables
